## RESEARCH ARTICLE

# Discriminating predation attempt outcomes during natural foraging using the post-buzz pause in the Japanese large-footed bat, *Myotis macrodactylus*

Yuuka Mizuguchi<sup>1</sup>, Emyo Fujioka<sup>1,2,\*</sup>, Olga Heim<sup>1,3</sup>, Dai Fukui<sup>4</sup> and Shizuko Hiryu<sup>1</sup>

## ABSTRACT

Bats emit a series of echolocation calls with an increasing repetition rate (the terminal buzz) when attempting to capture prey. This is often used as an acoustic indicator of prey-capture attempts. However, because it is directly linked to foraging efficiency, predation success is a more useful measure than predation attempts in ecological research. The characteristics of echolocation calls that consistently signify predation success across different situations have not been identified. Owing to additional influencing factors, identification of these characteristics is particularly challenging for wild bats foraging in their natural environment compared with those in flight chambers. This study documented the natural foraging behavior of wild Japanese large-footed bats (*Myotis macrodactylus*) using synchronized acoustic and video recordings. From the video recordings, we could assign 137 attacks to three outcome categories: prey captured (51.8%), prey dropped (29.2%) and failed attempt (19%). Based on previous indications from laboratory studies that the length of the silent interval following the terminal buzz (post-buzz pause) might reflect the prey-capture outcome, we compared post-buzz pause durations among categories of attack outcomes. The post-buzz pause was longest in the case of successful capture, suggesting that the length of the post-buzz pause is a useful acoustic indicator of predation success during natural foraging in *M. macrodactylus*. Our finding will advance the study of bat foraging behavior using acoustic data, including estimations of foraging efficiency and analyses of feeding habitat quality.

**KEY WORDS:** Echolocation, Terminal buzz, Acoustic indices, Trawling bats, Prey selection

## INTRODUCTION

Echolocating bats obtain information about the outside world by emitting sonar signals and listening to their echoes. This information helps them to find and capture prey, avoid obstacles and

navigate (Fenton, 1990; Simmons et al., 1979). During foraging, insectivorous bats emit a series of echolocation calls that vary in pulse length, frequency structure and repetition rate, and can therefore be grouped into three phases: the search, approach and terminal phases (Griffin et al., 1960; Kalko and Schnitzler, 1993; Schnitzler and Kalko, 2001; Simmons et al., 1979). The ‘terminal buzz’ is a rapid increase in the repetition rate that occurs just before a capture (Fig. 1A) (Fujioka et al., 2014; Schumm et al., 1991). This unique acoustic feature reflects a ‘fast decision response’ (Geberl et al., 2015), and has been used as an important acoustical indicator of capture attempts by bats during foraging (Britton and Jones, 1999; Griffin, 1958; Jakobsen and Surlykke, 2010; Racey and Swift, 1985).

Bats do not always succeed in capturing prey. Visual observations, photographs and video recordings of foraging bats have shown that they sometimes drop prey or fail to capture it (Acharya and Fenton, 1992; Britton and Jones, 1999; Kalko, 1995; Schnitzler et al., 1994). For instance, *Eptesicus nilssonii*, an aerial-hawking bat, was found to successfully capture moths during natural foraging in only 35–36% of attempts (Rydell, 1992; 1998). The capture success of the pipistrelle bat varies according to prey size, i.e. 60–70% of small-sized insects and 30–40% of large-sized insects, such as moths, were captured successfully (Kalko, 1995). Photographs of *Myotis daubentonii* foraging above the water surface have shown that the bats sometimes miss their prey or mistake it for other objects, such as floating leaves (Kalko and Schnitzler, 1989). Therefore, acoustic measures of predation success are desirable. These could be used to estimate the foraging status of bats from their emitted echolocation sounds, enabling the measurement of temporal changes in energy intake and bat foraging efficiency. The use of acoustic parameters to determine predation outcome would greatly contribute to our understanding of natural foraging behavior, with bats as a model.

Laboratory studies investigating the acoustic characteristics of predation success have found that the length of the silent period at the end of a terminal buzz (post-buzz pause) is longer when predation is successful compared with when it is unsuccessful (Acharya and Fenton, 1992; Britton and Jones, 1999; Surlykke et al., 2003; Übernickel et al., 2013). It is assumed that the length of the post-buzz pause reflects the time required for a bat to bend its head towards its tail membrane pouch and grasp the prey (Acharya and Fenton, 1992; Kalko and Schnitzler, 1989). Furthermore, if a predation attempt fails, the next search is expected to start earlier, leading to a shorter post-buzz pause. However, this relationship has not been confirmed in field experiments (Britton and Jones, 1999). Thus, to the best of our knowledge, the echolocation call characteristics that enable discrimination between successful and unsuccessful predation in naturally foraging bats have not yet been identified.

<sup>1</sup>Faculty of Life and Medical Sciences, Doshisha University, 1-3 Tatara miyakodani, Kyotanabe, Kyoto 610-0321, Japan. <sup>2</sup>Organization for Research Initiatives and Development, Doshisha University, 1-3 Tatara-miyakodani, Kyotanabe, Kyoto 610-0394, Japan. <sup>3</sup>JSPS International Research Fellow, Japan Society for the Promotion of Science, Kojimachi Business Center Building, 5-3-1 Kojimachi, Chiyoda-ku, Tokyo 102-0083, Japan. <sup>4</sup>The University of Tokyo Hokkaido Forest, Graduate School of Agricultural and Life Sciences, The University of Tokyo, 9-61, Yamabe-Higashimachi, Furano, Hokkaido 079-1563, Japan.

\*Author for correspondence (emyo.fujioka@gmail.com)

 E.F., 0000-0003-2830-9950

This is an Open Access article distributed under the terms of the Creative Commons Attribution License (<https://creativecommons.org/licenses/by/4.0>), which permits unrestricted use, distribution and reproduction in any medium provided that the original work is properly attributed.

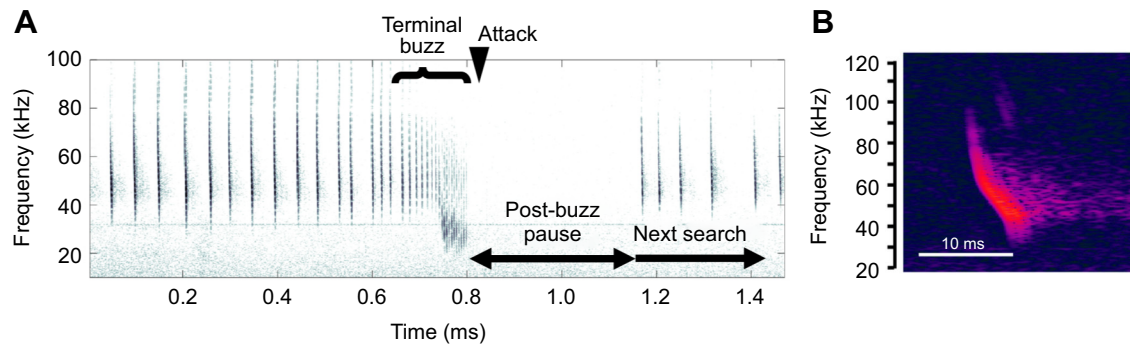

**Fig. 1. Echolocation calls of *Myotis macrodactylus*.** (A) Spectrogram of an echolocation call sequence from *Myotis macrodactylus* during prey capture. The terminal buzz is emitted just before attacking the prey. The time between the attack and the next search pulse is called the post-buzz pause. (B) Example search-phase echolocation call from *M. macrodactylus*. The fundamental frequency of this frequency-modulated (FM) pulse drops from approximately 90 to 40 kHz, with a peak frequency of 50 kHz.

The purpose of this study was to investigate whether the length of the post-buzz pause could be used as an acoustic indicator of successful predation in bats during natural foraging. We hypothesized that the length of the post-buzz pause would depend on the attack outcome. In particular, if a bat successfully captured its prey, we expected to find a longer post-buzz pause, with a shorter pause reflecting a failed attempt, as demonstrated in a previous laboratory experiment with *Myotis daubentonii* (Britton and Jones, 1999). Furthermore, if a bat dropped its prey, we expected the post-buzz pause to have an intermediate length.

## MATERIALS AND METHODS

### Study species and setting

The target species was the Japanese large-footed bat, *Myotis macrodactylus* (Temminck 1840), a member of the family Vespertilionidae. The bats from this species emit a frequency-modulated (FM) pulse with a fundamental frequency falling from approximately 90 to 40 kHz, and harmonic components (Fig. 1B) (Fukui et al., 2004; Luo et al., 2012). In Japan, these bats feed mainly on prey from the orders of Diptera, Trichoptera and Lepidoptera (Funakoshi and Takeda, 1998), and typically trawl for prey by flying above the water surface (Luo et al., 2012). Bat species that predominantly use trawling for prey capture are particularly suitable for detailed observations of natural foraging behavior via acoustic and video recordings because the feeding sites can be easily identified.

The study site was a 20 m diameter pond (Fig. 2A) in Tomakomai Experimental Forest (42°43'N, 141°36'E), a research facility of Hokkaido University in Tomakomai, Hokkaido, Japan. The pond is part of the Horonai stream (approximately 3 m wide) that enters the pond from one side and exits it on the other side (Fig. 2A). Bats regularly use the open space above this pond for foraging after sunset during early summer and fall. In most of the cases that we observed, the bats appeared upstream or downstream of the stream, foraged above the pond for a certain period of time, and exited via the downstream side of the stream. The average temperature, average humidity, weather conditions and sunset times during the recording period are shown in Table 1.

Although this site is designated as a wildlife reserve by the local government, no permission was required for this survey because it did not include any endangered or protected species (Fukui et al., 2019), and we did not engage in any animal capture or habitat disturbance.

### Microphone array recordings

Bat echolocation calls were recorded using four Y-shaped microphone array units, which comprised four omnidirectional electret condenser microphones (1/8-inch condenser microphones: models FG-23329-C05 and FG-23629-P16, Knowles Electronics, Itasca, IL, USA; Fujioka et al., 2011; Fig. 2B). The distance between the central microphone, M1, and each of the three equally spaced outer microphones was 0.9 m (Fig. 2B). The four units in the

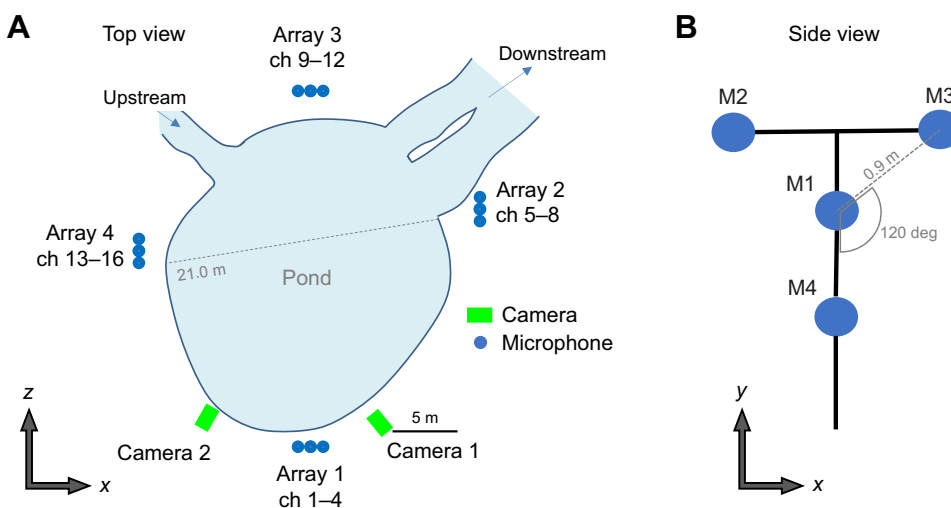

**Fig. 2. The microphone array system.**

(A) Top view of the pond. A Y-shaped microphone array system was set up at four locations around the pond (total of 16 microphones) and two cameras were set up on one side of the pond. (B) Schematic of a Y-shaped microphone array system consisting of four microphones, with M1 at the center and three microphones (M2–M4) placed 0.9 m apart from each other.

**Table 1. Overview of the metadata and weather conditions**

| Day of recording (day/mo/yr) | Sunset time (h)* | Recording start (h) | Recording duration (min) | Temperature (°C) | Humidity (%) | Weather |
|------------------------------|------------------|---------------------|--------------------------|------------------|--------------|---------|
| 18/6/2018                    | 19:14            | 20:00               | 130                      | 13.4             | 79.7         | Rain    |
| 19/6/2018                    | 19:15            | 20:15               | 110                      | 14.0             | 79.7         | Rain    |
| 23/6/2019                    | 19:16            | 20:27               | 23                       | 15.0             | 77.3         | Sunny   |
| 25/6/2019                    | 19:16            | 20:14               | 48                       | 15.0             | 86.2         | Cloudy  |
| 26/6/2019                    | 19:16            | 20:56               | 49                       | 17.0             | 87.5         | Sunny   |
| 27/6/2019                    | 19:16            | 20:29               | 61                       | 17.4             | 83.4         | Cloudy  |

\*Data were from the National Astronomical Observatory of Japan.

microphone arrays (arrays 1–4) were arranged such that echolocation calls emitted from anywhere around the pond area could be recorded.

The echolocation signals recorded by the microphones were amplified and band-pass filtered (10–250 kHz) using a custom-designed electronic circuit, and then digitized with 16-bit precision at a sampling rate of 500 kHz using a high-speed data acquisition card (PXIe-6358; National Instruments, Austin, TX, USA). The frequency response of the microphones, tested by using an ultrasound loudspeaker, was almost flat ( $\pm 6$  dB) within the range of 10–100 kHz, which corresponds to the frequency range of the fundamental echolocation call component of the bat. The output signals were synchronously stored using a personal computer via a custom program created using LabVIEW 2011 (National Instruments). Recordings were saved as files every 10 min, and recording was stopped when the batteries ran out.

Sound data from the central microphone in each of the four microphone arrays (channels 1, 5, 9, 13) were analyzed. In general, temporal parameters such as the pulse emission timing can be calculated more accurately using the oscillogram rather than the spectrogram (Ratcliffe and Jakobsen, 2018). However, in this study, the oscillogram was associated with a higher measurement uncertainty than the spectrogram because of the following reasons: (1) the signal-to-noise ratio of measured pulses was not very high, and (2) the initial part of the echolocation pulses emitted by *M. macrodactylus* had a relatively low sound intensity. Therefore, we used the spectrogram for specific and accurate measurements. We used Cool Edit 2000 (Syntrillium Software Corporation, Phoenix, AZ, USA) to display the spectrograms of the sounds (128-point FFT, Han window with overlap for  $N-1$ ) and extracted the terminal buzz signals with the clearest spectrograms for analysis. When the signal-to-noise ratio of a pulse was poor and extraction of the sound data was difficult, the data from the other channels were checked to determine the presence or absence of a terminal buzz. The post-buzz pause was calculated as the time between the end of the last pulse in the terminal buzz and the start of the next search pulse (Fig. 1A) using MATLAB (MathWorks, Natick, MA, USA), as measured from the spectrogram images. The timing of the end and start of the pulses was automatically obtained as the point of  $-15$  dB from the peak power.

### Video recording and analysis

The foraging behavior of the bats at the pond was recorded using high-speed cameras (LT Recorder Pro, ver. 1.04; DITECT, Tokyo, Japan), in synchronization with the sound recordings described above. The observation area was illuminated by infrared floodlights (LIR-CS88, IR LAB, Shenzhen, China) and the frame rate of the camera was set to 60 frames  $s^{-1}$ . An analog on/off control signal generated by a custom-made electrical circuit triggered video recordings so that the video and sound data could be synchronously recorded and stored on the PC. The video recording was stopped when the hard drive of the computer was full (after approximately 30 min per measurement day).

Video images were analyzed visually using Dipp-Image Viewer (version 1.22, DITECT). In the first step, we identified scenes that showed a bat attacking prey, i.e., cases in which the tail membrane and hindfeet of a bat touched the water surface. These scenes were classified as ‘catch’ or ‘failed’, and the ‘catch’ group was further classified as ‘captured’ (successful predation) or ‘dropped’ (Fig. 3). Scenes were classified as ‘captured’ when the bat caught the prey near the water surface with its feet or tail membrane and carried it away. Scenes where a bat caught prey but then dropped it were classified as ‘dropped’. The ‘failed’ category contained scenes in which the presence of the prey on the water surface was confirmed after the bat had attacked.

### Statistical analysis

All statistical analyses were performed in the R environment for statistical computing (<https://www.r-project.org/>) and its extended packages. To test our hypothesis, generalized linear mixed models (GLMMs) were built using the Template Model Builder package (glmmTMB\_1.0.2.1; <https://CRAN.R-project.org/package=glmmTMB>). Because several post-buzz pauses were measured in the same echolocation call sequence, and therefore from the same bat, we included ‘bat ID’ as a random effect in all models. Also, to account for any differences between recording events, we included the date of the recording as a random effect in all models. Hereby, the effect of bat ID was nested within the date factor. The post-buzz pause was modeled as a function of the ‘attack outcome’ factor (three levels; captured, dropped and failed). This variable was measured in milliseconds, and comprised integer values that could not have a value of 0. Therefore, we assumed a 0-truncated Poisson distribution for all models.

To test for the potential influence of weather (three levels: sunny, cloudy and rainy) and nightly temperature, we included each variable in a separate model. We used the Akaike information criterion (AIC), corrected for small sample sizes, to select the best model (function `model.sel`, package `MuMIn_1.43.17`; <https://CRAN.R-project.org/package=MuMIn>). We examined the quality of the model fit graphically using the functions in the DHARMA package (version 0.3.3.0; <https://CRAN.R-project.org/package=DHARMA>). We determined the overall model significance by using a  $\chi^2$  test, comparing the best parsimonious model with its null model containing only the random effects (function `anova`, package `stats_4.0.3`; <https://www.r-project.org/>). A  $\chi^2$  type-II Wald test (function `Anova`, package `car_3.0.10`; Fox and Weisberg, 2018) was used to identify significant factors within the model, and Bonferroni correction was applied to all pairwise *post hoc* comparisons between the levels of relevant factors (function `lsmeans`, package `emmeans_1.5.3`; <https://CRAN.R-project.org/package=emmeans>).

### RESULTS

We recorded the echolocation sounds of the bats for a total of 421 min on six separate nights (18 and 19 June 2018, and 23, 25, 26

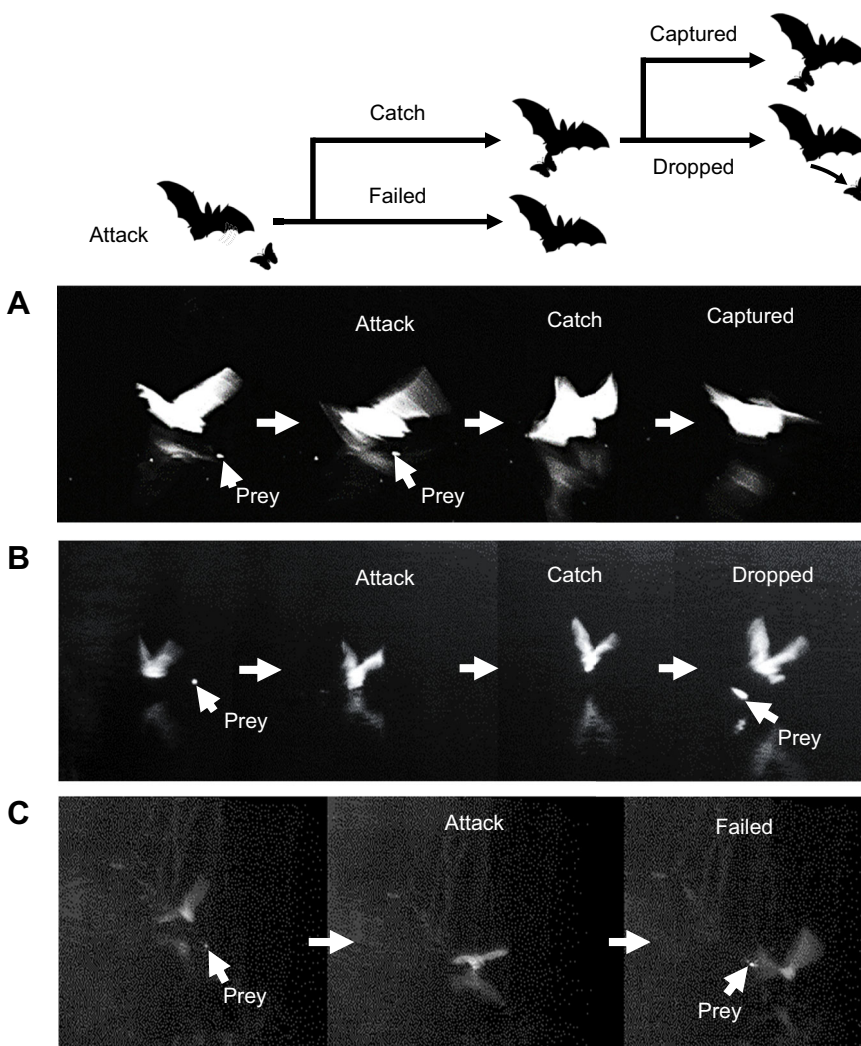

**Fig. 3. Images from video recordings of the three categories of attack outcomes.** (A) 'Captured': the bat captures the prey near the water surface with its feet or tail membrane and carries it away. (B) 'Dropped': the prey is seen moving away from the bat after the bat initially caught it. (C) 'Failed': the prey can be seen on the surface of the water after the bat passed it (Movie 1).

and 27 June 2019). From this period, 220 min of synchronized video and audio recording were collected and analyzed.

We classified a total of 137 attacks into the three categories (captured, dropped and failed) from the video recordings (Fig. 3, Movie 1). We found that bats kept hold of their prey in 51.8% (captured,  $n=71$ ) of the attacks, and dropped their prey or failed to capture it in 29.2% ( $n=40$ ) and 19% ( $n=26$ ) of the attacks, respectively. From the 137 attacks confirmed via video, we identified 135 terminal buzzes. From these buzzes, 87 post-buzz pauses could be measured from the spectrograms with a good signal-to-noise ratio (captured:  $n=37$ , dropped:  $n=33$ , failed:  $n=17$ ). Based on the minimum AIC value, the model containing only the attack outcome factor was the best (Table 2). After graphically examining the model residuals, the fit was determined to be

satisfactory. The best model explained significantly more variance than the null model ( $\chi^2=165.96$ , d.f.=2,  $P<0.001$ ), and the attack outcome factor was significant ( $\chi^2$  type-II Wald=161.8, d.f.=2,  $P<0.001$ ). The post-buzz pause was longest in cases of successful capture, with a mean $\pm$ s.e.m. value of  $200\pm 11.16$  ms ( $\chi^2$  type-II Wald test: capture versus failed ratio= $1.76\pm 0.08$ , d.f.=82,  $P<0.001$ , capture versus drop ratio= $1.31\pm 0.04$ , d.f.=82,  $P<0.001$ , Fig. 4). The post-buzz pause was shortest in cases of failed capture, with a mean value of  $114\pm 7.02$  ms ( $\chi^2$  type-II Wald test: drop versus failed ratio= $1.34\pm 0.05$ , d.f.=82,  $P<0.001$ ), while the mean post-buzz pause in cases of dropped prey had an intermediate value of  $153\pm 8.60$  ms.

We observed additional interesting behaviors in the video recordings. For example, the bat attacked small branches ('attack

**Table 2. Overview of models and their comparison based on the corrected Akaike information criterion (AICc)**

| Model no. | Factors         |         |             | d.f. | Loglik | AICc | Delta | Weight |
|-----------|-----------------|---------|-------------|------|--------|------|-------|--------|
|           | Capture outcome | Weather | Temperature |      |        |      |       |        |
| 1         | +               |         |             | 5    | -890   | 1792 | 0     | 0.88   |
| 2         | +               | +       |             | 7    | -890   | 1796 | 4     | 0.12   |
| 3         | +               |         | +           | 19   | -879   | 1808 | 16    | <0.0   |
| 4         |                 |         |             | 3    | -973   | 1953 | 162   | <0.0   |

The + means that the associated factor was present in the model. Loglik, log likelihood.

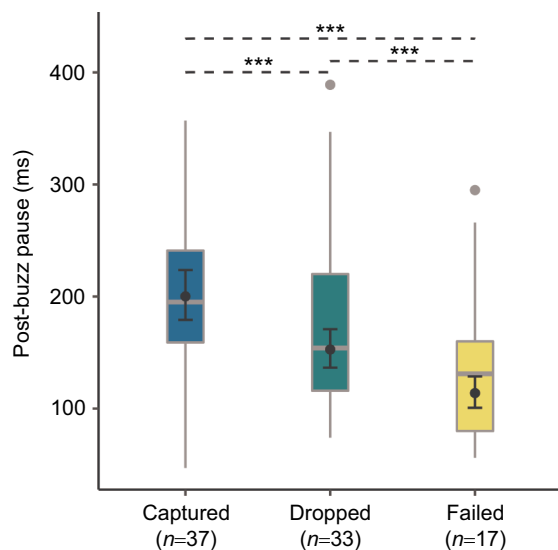

**Fig. 4. Post-buzz pause length for the various attack outcomes (captured, dropped and failed).** Boxplots represent the raw data for each category. Means (filled circles) and 95% confidence intervals were derived for the best model (Table 2). Asterisks indicate significant differences between factor levels based on a Bonferroni-corrected *post hoc* test conducted using the emmeans package in R (\*\* $P < 0.001$ ).

branch' in Movie 2) or the same prey again after initially failing to capture it ('repeated attack' in Movie 2). In addition, in cases of dropped prey, the bats usually dropped the item immediately after capture. However, there were a few cases where the bats dropped objects after holding them for a longer period ('throw away' in Movie 2).

## DISCUSSION

The terminal buzz emitted by bats has traditionally been treated as an acoustic indicator of an attack on a prey item (Britton and Jones, 1999; Griffin, 1958; Jakobsen and Surlykke, 2010; Racey and Swift, 1985). However, the presence of a terminal buzz is not sufficient to determine whether predation was successful. Various potentially indicative acoustic features have been examined, such as the lengths of terminal buzz I and II, the length of the post-buzz pause, and the average interpulse interval (IPI) after the terminal buzz (Acharya and Fenton, 1992; Britton and Jones, 1999; Surlykke

et al., 2003; Übernicket et al., 2013). Laboratory experiments on foraging behavior have indicated that the presence or absence of predation affects the post-buzz pause (Acharya and Fenton, 1992; Britton and Jones, 1999; Surlykke et al., 2003; Übernicket et al., 2013). In contrast, no clear evidence for such a relationship could be derived from observations of wild bats during natural foraging (Britton and Jones, 1999; Surlykke et al., 2003). This was due to poor-quality acoustic data and the tendency for post-buzz pauses to be relatively short as a result of adaptation by the bats to the complex natural environment. To the best of our knowledge, the present study is the first to show that the length of the post-buzz pause can be used to measure successful predation by wild bats during natural foraging.

## Prey selection during natural foraging in trawling bats

In the present study, *M. macrodactylus* bats dropped their prey during 30% of all recorded attacks (40 drops out of 137 attacks). Therefore, these bats do not appear highly capable of discriminating their prey, but rather make their prey selection after capture. This may explain the intermediate values of the post-buzz pause observed in this study.

Previous studies on prey selection in bats that predominantly hunt via trawling, such as *M. macrodactylus*, have also suggested that bats have relatively weak target discrimination ability. Indeed, bats have been observed to sometimes attack objects instead of prey (Barclay and Brigham, 1994; Kalko and Schnitzler, 1989). For example, *Myotis lucifugus* and *M. yumanensis* did not appear to discriminate among targets and attacked inedible targets (beetles and leaves) as well as edible prey of the same size (moths) during natural foraging (Barclay and Brigham, 1994). Other trawling *Myotis* species, such as *M. dasycneme*, *M. daubentonii* and *M. capaccinii*, repeatedly attempted to capture inedible dummy targets placed on artificial surfaces that mimicked the reverberatory properties of water (Siemers et al., 2001). Therefore, this might represent a general prey selection behavior in trawling bats.

In contrast, bats might drop not only inedible targets but also edible prey unintentionally. For instance, in the 'repeated attack' shown in Movie 2, the bat most likely dropped an edible prey item because it recaptured that item after dropping it. However, because this type of behavior was captured rarely by our cameras, there is a limitation to discriminate between these two types of behaviors in this study. In the future, knowing what the bats have caught would help distinguish between drops of inedible or edible targets.

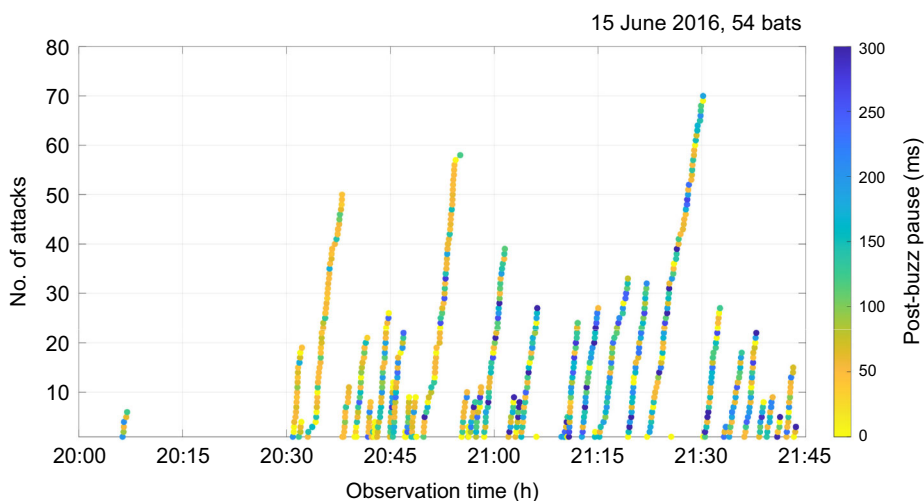

**Fig. 5. Temporal changes in the number of attacks by each bat that entered the foraging site on 15 June 2016.** The time series shows the accumulation of attacks (filled circles) and the corresponding post-buzz pause lengths (color-coded). For reference, the average post-buzz pause was 200 ms for captured, 153 ms for dropped and 114 ms for failed attempts.

### Other factors that might influence the post-buzz pause

In a previous study, no significant correlation between prey size and post-buzz pause during foraging of *Pipistrellus pygmaeus* was found (Surlykke et al., 2003). Furthermore, a study on *M. daubentonii* – extremely similar to *M. macrodactylus* in morphology and behavior – reported no correlation between the prey size and the post-buzz pause in a field experiment (Britton and Jones, 1999). In contrast, the post-buzz pause of *P. pygmaeus* was reported to vary depending on the prey type (Surlykke et al., 2003), suggesting that the post-buzz pause might have a different distribution depending on the prey type eaten by *M. macrodactylus* in this study. It is necessary to verify this in the future by presenting several types of prey to bats.

Another potential factor that might influence the post-buzz pause length is the escape behavior of the prey. Some moth species use jamming sounds or exhibit escape flight movements when bat ultrasound is detected (Corcoran et al., 2009; Nakano et al., 2015). In this study, however, no escape flight movement was observed in the 137 records in which the bats caught their prey in the trawling mode, although there is no guarantee that the partly submerged prey could perceive the echolocation calls. In addition, most of the prey items near the water surface may not be Lepidoptera, but hatching aquatic insects such as mayflies and chironomids. However, the possibility that the camera did not capture the movement of the prey items remains. As defensive behavior from prey items might influence the post-buzz pause, further investigation is needed in future studies.

In summary, we found a clear relationship between the post-buzz pause and predation success in naturally foraging *M. macrodactylus*. However, further investigation regarding this relationship, including influencing factors such as prey type, size and defensive behavior, will be needed to develop a reliable acoustic indicator of predation success in wild bats.

### Post-buzz pause applied: example of temporal changes in individual-specific predation success

To elucidate what insights could be gained by investigating post-buzz pauses during natural foraging, we recorded the foraging behavior of individual *M. macrodactylus* bats using four microphone arrays surrounding the pond, in the same experimental setting, for approximately 100 min starting at 20:04 h on 15 June 2016. The recorded post-buzz pauses were analyzed based on their duration (represented by colors in Fig. 5) rather than whether predation was successful. During this recording period, a total of 70 bats visited the pond, 54 of which produced feeding buzzes (attacks) (note that the same bat might have entered the feeding area on multiple occasions). Bats that arrived between 20:30 h and 21:00 h, which was the busiest period, seemed to have shorter post-buzz pauses than those that arrived during the next 30 min period. If predation success is related to the length of the post-buzz pause, then this observation suggests that predation success greatly varies depending on the time of foraging, and potentially also on the individual. Note that the post-buzz pause could also change depending on the prey type (see above). This example shows that by using the post-buzz pause length as an acoustic indicator of predation success, we may be able to investigate detailed temporal aspects of foraging behavior in bats in feeding patches. Specifically, both the number of attacks and the length of the post-buzz pause can be used as indicators of predation efficiency during natural foraging.

### Conclusions

In this study, we conducted synchronized acoustic and video recordings of foraging behavior in the wild Japanese large-footed

bat, *M. macrodactylus*. Our data showed that the bats either kept hold of their prey, dropped it or failed to capture it after an attack. Overall, predation was successful in 51.8% of attacks. Furthermore, the post-buzz pause was significantly longer in cases of successful predation than in the other two cases. This study is the first to identify differences in acoustic features between successful and unsuccessful predation in naturally foraging bats. Using the post-buzz pause as an indicator of successful predation will enable detailed investigations of wild bat foraging behavior, including foraging efficiency and, potentially, temporal changes in energy intake within feeding areas.

### Acknowledgements

We are grateful to Fumiya Hamai, Genki Nakai, Koki Asano, Mika Fukushima, Yoshimasa Kitamura, Akihiro Nakae, Yoshiaki Kubota, Yuta Sakuragi, Nozomi Sonobe and Mika Kuroda for their assistance in conducting the field recordings.

### Competing interests

The authors declare no competing or financial interests.

### Author contributions

Conceptualization: E.F., S.H.; Methodology: Y.M., E.F.; Software: Y.M., O.H.; Validation: Y.M., S.H.; Formal analysis: Y.M., E.F., O.H.; Investigation: Y.M., E.F., D.F.; Resources: D.F.; Data curation: Y.M., E.F.; Writing - original draft: Y.M., E.F., S.H.; Writing - review & editing: O.H., D.F., S.H.; Supervision: S.H.; Project administration: S.H.; Funding acquisition: Y.M., E.F., O.H., D.F., S.H.

### Funding

This work was supported by the Japan Society for the Promotion of Science (JSPS) KAKENHI Grants [JP 18H03786, 16H06542 to S.H., 19K16237 to E.F., 16K00568 to D.F., 21H05295 to S.H., 21H04923 to D.F.] and the Sasagawa Scientific Research Grant from The Japan Science Society [2020-5023 to Y.M.]. Further financial support was provided by the JSPS postdoctoral fellowship and KAKENHI Grant [JP 19F19090 to O.H.]. Open Access funding provided by SECOM Science and Technology Foundation. Deposited in PMC for immediate release.

### References

- Acharya, L. and Fenton, M. B. (1992). Echolocation behaviour of vespertilionid bats (*Lasiurus cinereus* and *Lasiurus borealis*) attacking airborne targets including arctiid moths. *Can. J. Zool.* **70**, 1292-1298. doi:10.1139/z92-180
- Barclay, R. M. R. and Brigham, R. M. (1994). Constraints on optimal foraging: a field test of prey discrimination by echolocating insectivorous bats. *Anim. Behav.* **48**, 1013-1021. doi:10.1006/ANBE.1994.1334
- Britton, A. C. and Jones, G. (1999). Echolocation behavior and prey-capture success in foraging bats: Laboratory and field experiments on *Myotis daubentonii*. *J. Exp. Biol.* **202**, 1793-1801. doi:10.1242/jeb.202.13.1793
- Corcoran, A. J., Barber, J. R. and Conner, W. E. (2009). Tiger moth jams bat sonar. *Science* **325**, 325-327. doi:10.1126/science.1174096
- Fenton, M. B. (1990). The foraging behaviour and ecology of animal eating bats. *Can. J. Zool.* **68**, 411-422. doi:10.1139/z90-061
- Fox, J. and Weisberg, S. (2018). *An R Companion to Applied Regression*. Sage Publications.
- Fujioka, E., Mantani, S., Hiryu, S., Riquimaroux, H. and Watanabe, Y. (2011). Echolocation and flight strategy of Japanese house bats during natural foraging, revealed by a microphone array system. *J. Acoust. Soc. Am.* **129**, 1081-1088. doi:10.1121/1.3523300
- Fujioka, E., Aihara, I., Watanabe, S., Hiryu, S., Simmons, J. A., Riquimaroux, H. and Watanabe, Y. (2014). Rapid shifts of sonar attention by *Pipistrellus abramus* during natural hunting for multiple prey. *J. Acoust. Soc. Am.* **136**, 3389-3400. doi:10.1121/1.4898428
- Fukui, D., Agetsuma, N. and Hill, D. A. (2004). Acoustic identification of eight species of bat (Mammalia: Chiroptera) inhabiting forests of southern Hokkaido, Japan: potential for conservation monitoring. *Zoolog. Sci.* **21**, 947-955. doi:10.2108/zsj.21.947
- Fukui, D., Sun, K. and Kruskop, S. V. (2019). *Myotis macrodactylus*. The IUCN Red List of Threatened Species 2019, e.T14177A22065868. doi:10.2305/IUCN.UK.2019-3.RLTS.T14177A22065868.en.
- Funakoshi, K. and Takeda, Y. (1998). Food habits of sympatric insectivorous bats in southern Kyushu, Japan. *Mamm. Study* **23**, 49-62. doi:10.3106/mammalstudy.23.49
- Geberl, C., Brinkløv, S., Wiegrebe, L. and Surlykke, A. (2015). Fast sensory-motor reactions in echolocating bats to sudden changes during the final buzz and prey intercept. *Proc. Natl Acad. Sci. USA* **112**, 4122-4127. doi:10.1073/pnas.1424457112

- Griffin, D. R. (1958). *Listening in the dark*. New Haven: Yale University Press.
- Griffin, D. R., Webster, F. A. and Michéy, C. R. (1960). The echolocation of flying insects by bats. *Anim. Behav.* **8**, 141-154. doi:10.1016/0003-3472(60)90022-1
- Jakobsen, L. and Surlykke, A. (2010). Vespertilionid bats control the width of their biosonar sound beam dynamically during prey pursuit. *Proc. Natl. Acad. Sci. USA* **107**, 13930-13935. doi:10.1073/pnas.1006630107
- Kalko, E. (1995). Insect pursuit, prey capture and echolocation in pipistrelle bats (Microchiroptera). *Anim. Behav.* **50**, 861-880. doi:10.1016/0003-3472(95)80090-5
- Kalko, E. K. V. and Schnitzler, H. U. (1989). The echolocation and hunting behavior of Daubenton's bat, *Myotis daubentonii*. *Behav. Ecol. Sociobiol.* **24**, 238-255. doi:10.1007/BF00295202
- Kalko, E. and Schnitzler, H. U. (1993). Plasticity in echolocation signals of European pipistrelle bats in search flight: implications for habitat use and prey detection. *Behav. Ecol. Sociobiol.* **33**, 415-428. doi:10.1007/BF00170257
- Luo, J.-H., Ou, W., Liu, Y., Wang, J., Wang, L. and Feng, J. (2012). Plasticity in echolocation calls of *Myotis macrodactylus* (Chiroptera: Vespertilionidae): implications for acoustic identification. *Acta Theriol.* **57**, 137-143. doi:10.1007/s13364-011-0062-9
- Nakano, R., Takanashi, T. and Surlykke, A. (2015). Moth hearing and sound communication. *J. Comp. Physiol. A* **201**, 111-121. doi:10.1007/s00359-014-0945-8
- Racey, P. A. and Swift, S. M. (1985). Feeding ecology of *Pipistrellus pipistrellus* (Chiroptera: Vespertilionidae) during pregnancy and lactation. I. Foraging behaviour. *J. Anim. Ecol.* **54**, 205-215. doi:10.2307/4631
- Ratcliffe, J. M. and Jakobsen, L. (2018). Don't believe the mike: behavioural, directional, and environmental impacts on recorded bat echolocation call measures. *Can. J. Zool.* **96**, 283-288. doi:10.1139/cjz-2017-0219
- Rydell, J. (1992). Exploitation of insects around streetlamps by bats in Sweden. *Funct. Ecol.*, **6**, 744-750. doi:10.2307/2389972
- Rydell, J. (1998). Bat defence in lekking ghost swifts (*Hepialus humuli*), a moth without ultrasonic hearing. *Proc. R. Soc. Lond. B Biol. Sci.* **265**, 1373-1376. doi:10.1098/rspb.1998.0444
- Schnitzler, H.-U. and Kalko, E. K. (2001). Echolocation by insect-eating bats: we define four distinct functional groups of bats and find differences in signal structure that correlate with the typical echolocation tasks faced by each group. *Bioscience* **51**, 557-569. doi:10.1641/0006-3568(2001)051[0557:EBIEB]2.0.CO;2
- Schnitzler, H.-U., Kalko, E., Kaipf, I. and Grinnell, A. D. (1994). Fishing and echolocation behavior of the greater bulldog bat, *Noctilio leporinus*, in the field. *Behav. Ecol. Sociobiol.* **35**, 327-345. doi:10.1007/BF00184422
- Schumm, A., Krull, D. and Neuweiler, G. (1991). Echolocation in the notch-eared bat, *Myotis emarginatus*. *Behav. Ecol. Sociobiol.* **28**, 255-261. doi:10.1007/BF00175098
- Siemers, B. M., Stitz, P. and Schnitzler, H.-U. (2001). The acoustic advantage of hunting at low heights above water: behavioural experiments on the European 'trawling' bats *Myotis capaccinii*, *M. dasycneme* and *M. daubentonii*. *J. Exp. Biol.* **204**, 3843-3854. doi:10.1242/jeb.204.22.3843
- Simmons, J. A., Fenton, M. B. and O'Farrell, M. J. (1979). Echolocation and pursuit of prey by bats. *Science* **203**, 16-21. doi:10.1126/science.758674
- Surlykke, A., Futtrup, V. and Tougaard, J. (2003). Prey-capture success revealed by echolocation signals in pipistrelle bats (*Pipistrellus pygmaeus*). *J. Exp. Biol.* **206**, 93-104. doi:10.1242/jeb.00049
- Übernackel, K., Tschapka, M. and Kalko, E. K. (2013). Flexible echolocation behavior of trawling bats during approach of continuous or transient prey cues. *Front. Physiol.* **4**, 96. doi:10.3389/fphys.2013.00096
